# Supplementary material
Source: MDPI journal article supplement (https://www.mdpi.com/2075-5309/12/12/2248)
Supplement: s1 [file s1]

## Supplementary Materials

This document is a supplement to the article titled “Impacts of Micro-Scale Built Environment Features on Tourists’ Walking Behaviors in Historic Streets: Insights from Wudaoy-ing Hutong, China”

*Supplementary Materials - Table S1. The descriptive statistics of the cumulative assignment of MiBE*

| Categories                                    | Demensions                    | Variables                              | Min  | Max   | Mean | SD   |
|-----------------------------------------------|-------------------------------|----------------------------------------|------|-------|------|------|
| Scale of streets and Architectures            | Scale of streets              | Street width                           | 5.14 | 12.82 | 6.62 | 1.08 |
|                                               |                               | Ratio of street height to width        | 0    | 1.28  | 0.50 | 0.23 |
|                                               | Scale of Architectures        | Building width                         | 0.81 | 48.43 | 6.53 | 6.87 |
|                                               |                               | Building height                        | 0    | 7     | 3.20 | 1.31 |
| Features of street transition space           | Transitional space perception | Floor covering                         | 0    | 16    | 1.30 | 2.53 |
|                                               |                               | Floor uplift                           | 0    | 16    | 1.81 | 2.89 |
|                                               |                               | Space separation                       | 0    | 8     | 0.50 | 1.48 |
|                                               |                               | Façade backward                        | 0    | 16    | 1.59 | 2.77 |
|                                               |                               | Top surface epitaxy                    | 0    | 16    | 1.03 | 2.51 |
|                                               |                               | Lamp                                   | 0    | 3     | 0.05 | 0.32 |
|                                               | Street furniture              | Bench                                  | 0    | 15    | 0.63 | 2.09 |
|                                               |                               | Dinner table                           | 0    | 15    | 0.23 | 1.44 |
|                                               |                               | Sunshade                               | 0    | 3     | 0.02 | 0.25 |
|                                               |                               | Outside plant                          | 0    | 13    | 1.14 | 2.08 |
|                                               |                               | Deep bottom                            | 0    | 8     | 0.40 | 1.10 |
| Features of the ground floor along the street | Permeability                  | Longitudinal intersection road         | 0    | 3     | 0.06 | 0.36 |
|                                               |                               | Ordinary window                        | 0    | 16    | 1.14 | 2.52 |
|                                               | Transparency                  | Trade display window                   | 0    | 20    | 2.56 | 4.02 |
|                                               |                               | Bay-window                             | 0    | 14    | 1.23 | 2.87 |
|                                               |                               | French window                          | 0    | 16    | 1.82 | 3.37 |
|                                               |                               | Glass door                             | 0    | 18    | 2.90 | 3.67 |
|                                               | Tortuosity                    | Straight ground floor facade           | 0    | 16    | 2.64 | 3.24 |
|                                               |                               | Zigzag ground floor facade             | 0    | 20    | 1.51 | 3.20 |
| Building facade features                      | Chinese architecture features | Shingle slope roof                     | 0    | 11    | 1.04 | 2.01 |
|                                               |                               | Chinese wooden door                    | 0    | 11    | 0.92 | 2.00 |
|                                               |                               | Chinese wooden window                  | 0    | 11    | 0.38 | 1.50 |
|                                               |                               | Stone drum / stone column / stone lion | 0    | 10    | 0.59 | 1.67 |
|                                               |                               | Chinese lantern                        | 0    | 12    | 0.33 | 1.48 |
|                                               |                               | Chinese carve patterns                 | 0    | 12    | 0.42 | 1.45 |
|                                               |                               | Coloured drawing                       | 0    | 8     | 0.31 | 1.05 |

|                             |                              |                                                |                |        |        |       |      |
|-----------------------------|------------------------------|------------------------------------------------|----------------|--------|--------|-------|------|
| Building color and material | Modern architecture features | Door studs / knockers                          | 0              | 11     | 0.17   | 1.05  |      |
|                             |                              | High door and window                           | 0              | 12     | 0.97   | 2.17  |      |
|                             |                              | Straight cornice                               | 0              | 14     | 0.26   | 1.37  |      |
|                             |                              | Non openable window                            | 0              | 15     | 1.99   | 3.54  |      |
|                             |                              | Entrance and exit without elevation difference | 0              | 7      | 0.10   | 0.77  |      |
|                             |                              | Smooth architectural slayer                    | 0              | 9      | 0.37   | 1.26  |      |
|                             |                              | Simple facade architrave                       | 0              | 14     | 0.39   | 1.51  |      |
|                             |                              | Other detail features                          | Roof terrace   | 0      | 15     | 0.19  | 1.40 |
|                             |                              |                                                | balcony        | 0      | 3      | 0.06  | 0.34 |
|                             | Shop signboard               |                                                | 0              | 19     | 2.49   | 3.26  |      |
|                             | Building color               | Color purity                                   | 0              | 21     | 2.44   | 3.70  |      |
|                             |                              | Color diversity                                | 0              | 15     | 1.15   | 2.67  |      |
|                             |                              | Self-color contrast                            | 0              | 16     | 1.04   | 2.18  |      |
|                             |                              | Environmental color contrast                   | 0              | 12     | 0.65   | 1.86  |      |
|                             |                              | RGB Mean                                       | 67.28          | 163.54 | 111.71 | 14.52 |      |
|                             |                              | RGB SD                                         | 33.95          | 92.22  | 62.35  | 9.51  |      |
|                             |                              | Lightness Mean                                 | 68.68          | 164.58 | 112.90 | 14.60 |      |
|                             |                              | Lightness SD                                   | 32.63          | 91.74  | 61.17  | 9.88  |      |
|                             |                              | Building material                              | Glass material | 0      | 17     | 2.03  | 3.44 |
|                             | Brick material               |                                                | 0              | 21     | 1.99   | 2.92  |      |
|                             | Wood material                |                                                | 0              | 15     | 0.94   | 2.34  |      |
|                             | Concrete material            |                                                | 0              | 12     | 0.12   | 1.03  |      |
|                             | Metal material               |                                                | 0              | 20     | 0.42   | 2.06  |      |
|                             | Stone material               |                                                | 0              | 9      | 0.08   | 0.76  |      |
|                             | Coating material             |                                                | 0              | 16     | 0.80   | 2.23  |      |
|                             | Material contrast            |                                                | 0              | 20     | 1.61   | 3.08  |      |
|                             | Material diversity           |                                                | 0              | 44     | 6.38   | 6.93  |      |
|                             | Commodity display            | Artwork                                        | 0              | 16     | 0.84   | 2.15  |      |
|                             |                              | Clothes & Accessories                          | 0              | 9      | 0.56   | 1.52  |      |
|                             |                              | food                                           | 0              | 11     | 0.29   | 1.34  |      |
|                             |                              | animal                                         | 0              | 10     | 0.09   | 0.84  |      |
|                             |                              | Inside plant                                   | 0              | 14     | 0.83   | 2.20  |      |
| N                           |                              | 144                                            |                |        |        |       |      |
